# Supplementary material for: Diabetes and Hypertension Consistently Predict the Presence and Extent of Coronary Artery Calcification in Symptomatic Patients: A Systematic Review and Meta-Analysis
Source: MDPI journal article supplement (doi:10.3390/ijms17091481), 2016-09-06
Supplement: s1 [file s1]

# Supplementary Materials: Diabetes and Hypertension Consistently Predict the Presence and Extent of Coronary Artery Calcification in Symptomatic Patients: A Systematic Review and Meta-Analysis

Rachel Nicoll, Ying Zhao, Pranvera Ibrahim, Gunilla Olivecrona and Michael Henein

**Table S1.** Meta-analysis: Pooled risk factors and their ORs predicting CAC presence excluding Kovacic et al.

| Risk Factors                  | Pooled OR<br>(95% CI) | P for Overall<br>Effect | Studies          | Patient<br>Numbers | Egger's Test |         |         |
|-------------------------------|-----------------------|-------------------------|------------------|--------------------|--------------|---------|---------|
|                               |                       |                         |                  |                    | Intercept    | t Value | p-Value |
| Age (years)                   | 1.07<br>(1.00–1.04)   | 0.04                    | [10,14,18]       | 1163               | -            | -       | -       |
| Male gender<br>(yes/no)       | 1.74<br>(1.38–2.20)   | <0.00001                | [12,14,16–18]    | 11,594             | -0.80        | 0.92    | 0.46    |
| Hypertension<br>(yes/no)      | 1.89<br>(1.59–2.23)   | <0.00001                | [10–12,14,16–18] | 12,682             | -0.21        | 0.12    | 0.91    |
| Diabetes mellitus<br>(yes/no) | 1.45<br>(1.18–1.78)   | <0.00001                | [10–12,14,16–18] | 12,682             | -0.81        | 0.37    | 0.73    |
| Smoking<br>(yes/no)           | 1.53<br>(0.82–2.86)   | 0.18                    | [10–12,14,16–18] | 12,682             | 5.89         | 1.35    | 0.25    |
| Dyslipidaemia<br>(yes/no)     | 1.60<br>(0.56–4.51)   | 0.38                    | [10,12,16,17]    | 10,853             | 2.87         | 1.39    | 0.39    |

## Age

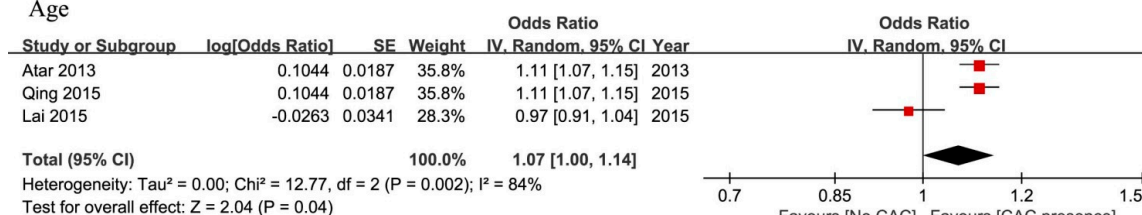

## Male gender

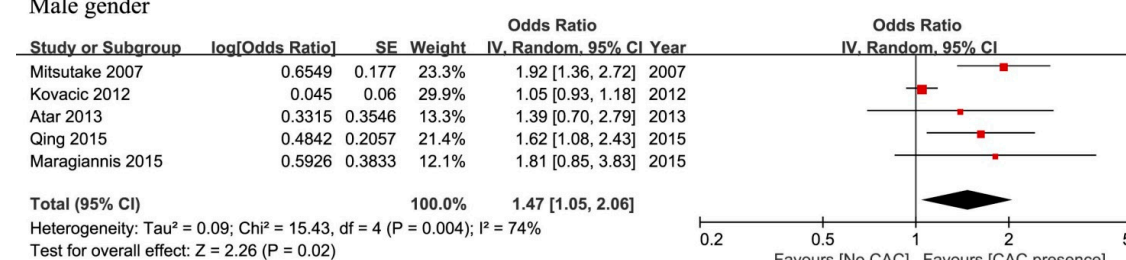

## Hypertension

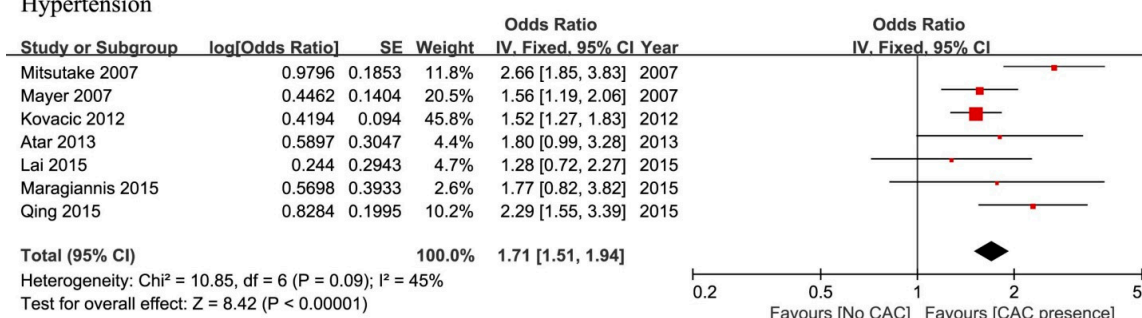

**Figure S1.** Cont.

## Diabetes melitus

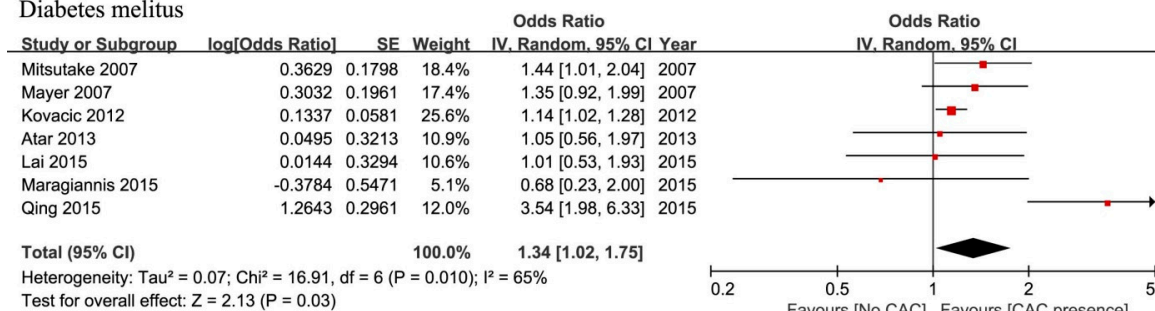

## Smoking

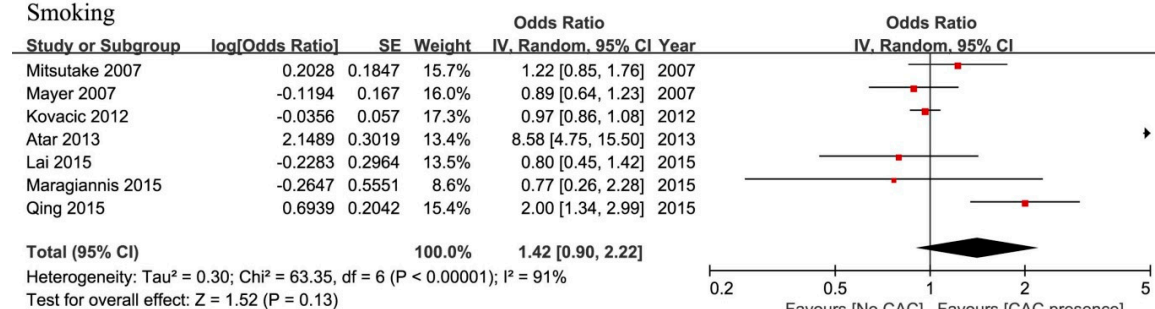

## Dyslipidemia

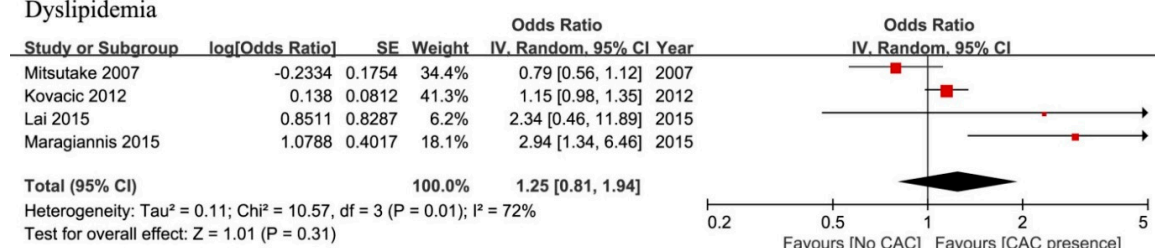

**Figure S1.** Forest Plots. Age ( $OR = 1.07$ ,  $p = 0.04$ ), male gender ( $OR = 1.47$ ,  $p = 0.02$ ), hypertension ( $OR = 1.71$ ,  $p < 0.00001$ ), and diabetes ( $OR = 1.34$ ,  $p = 0.03$ ) were predictive for CAC presence. Smoking and dyslipidaemia were not predictive.

## Male gender

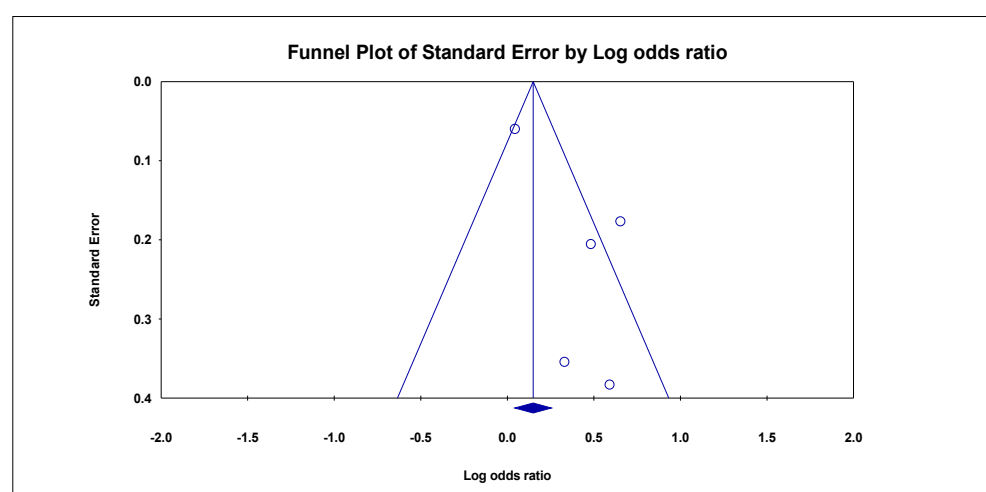

**Figure S2.** Cont.

## Hypertension

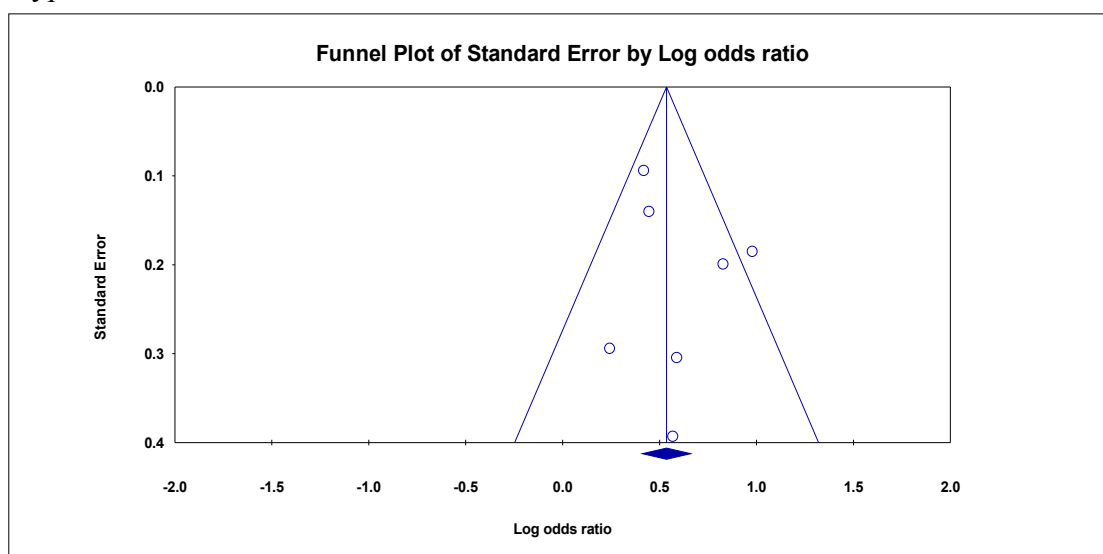

## Diabetes

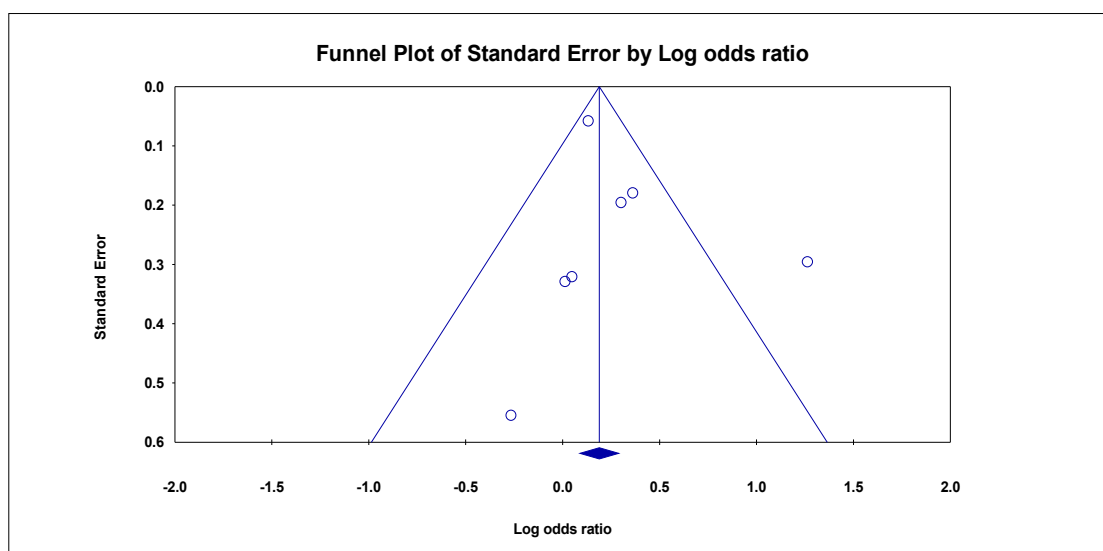

## Smoking

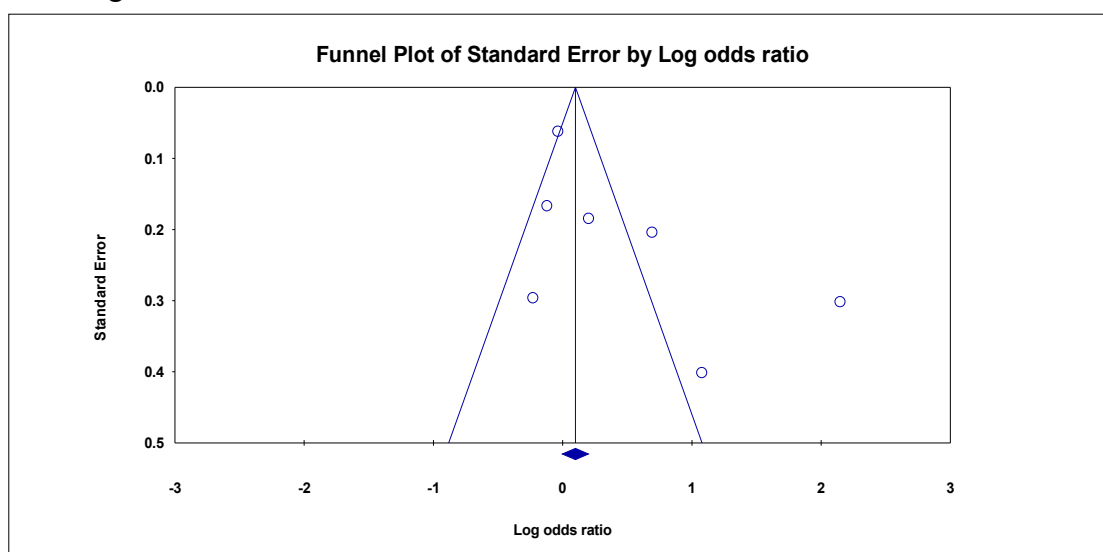

Figure S2. Cont.

## Dyslipidaemia

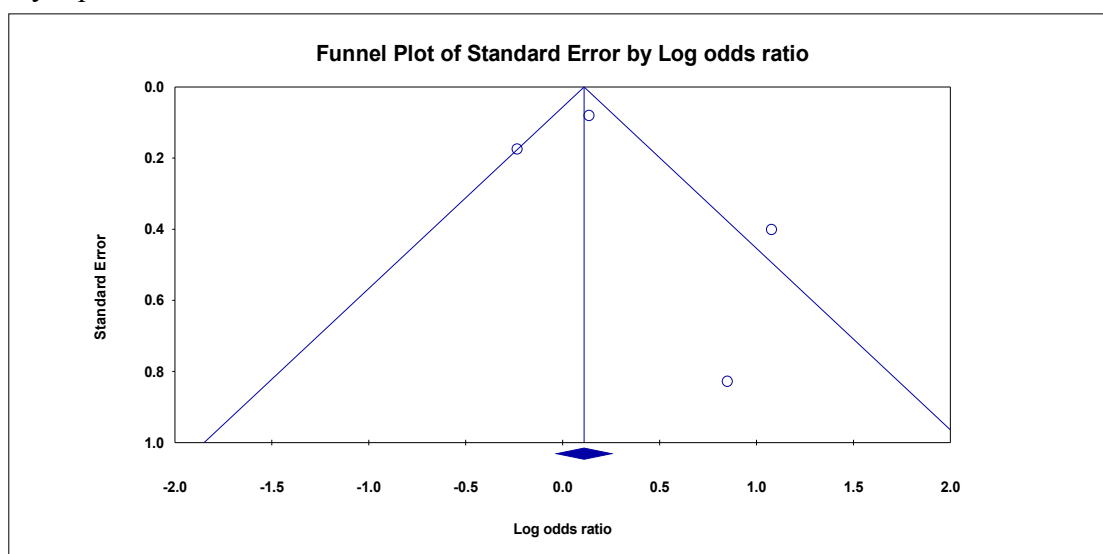

**Figure S2.** Funnel Plots.
